# Supplementary material
Source: PubMed Central journal article supplement (PMC3903325)

## SUPPLEMENTARY FIGURE LEGENDS

### Figure S1. Flow cytometric analysis of bone marrow B cell populations

Bone marrow cells isolated from 6-8-wk-old *ship<sup>fl/fl</sup>cd19<sup>cre/+</sup>* or *ship<sup>fl/f</sup>* mice were stained with antibodies against different surface markers. FACS analysis was performed to identify different cell fractions: HSC (B220-, CD24+ and CD43+), Pro-B (CD25-, CD19+ and CD43+), Pre-B (CD43+, B220+ and CD24 high), immature B (B220+, IgM+ and IgD-) and recirculating B (B220+, IgM+ and IgD+). All data shown are from a representative experiment of four.

### Figure S2. Flow cytometric analysis of B cell populations in spleen

Splenocytes isolated from 6-8-wk-old *ship<sup>fl/fl</sup>cd19<sup>cre/+</sup>* or *ship<sup>fl/f</sup>* mice were stained with antibodies against different surface markers for FACS analysis to identify different B cell populations: (A) Follicular (Fo) B cells (B220+, CD21+, CD23+) and Mz B cells (B220+, CD21+, CD23-), (B) Germinal center (GC) B cells (B220+, GL7<sup>high</sup>, Fas<sup>high</sup>), (C) Transitional 1 (T1) B cells (B220+, IgD<sup>low</sup>, IgM<sup>high</sup>), T2 (B220+, IgD<sup>high</sup>, IgM<sup>high</sup>) and Mature (M) B cells (B220+, IgD<sup>high</sup>, IgM<sup>low</sup>), (D) Transitional 3 (T3) B cells (B220+, CD93+, CD23+, IgM<sup>low</sup>), (E) B1 cells (CD5int, B220int) and (F) Plasma cells (B220<sup>low</sup>, IgM-, CD138+). All data shown are from a representative experiment of four.

### Figure S3. NP-specific V<sub>H</sub> gene sequence analysis

V<sub>H</sub> gene nucleotide sequence from different B-cell clones isolated from *ship<sup>fl/fl</sup>cd19<sup>cre/+</sup>* or *ship<sup>fl/fl</sup>* mice 14 days after NP-CGG (alum) immunization. The sequences from different clones were aligned to the germline V<sub>H</sub>186.2 gene sequence. A dot denoted sequence identity. Mutations that introduced an early stop codon were marked with \*.

### Figure S4. Sequence analysis of the CDR 3 region

The D segments in the CDR 3 regions from the V<sub>H</sub> genes were aligned with the germline D sequences: DFL16.1, DSP2.3 and DQ52.

Figure S1

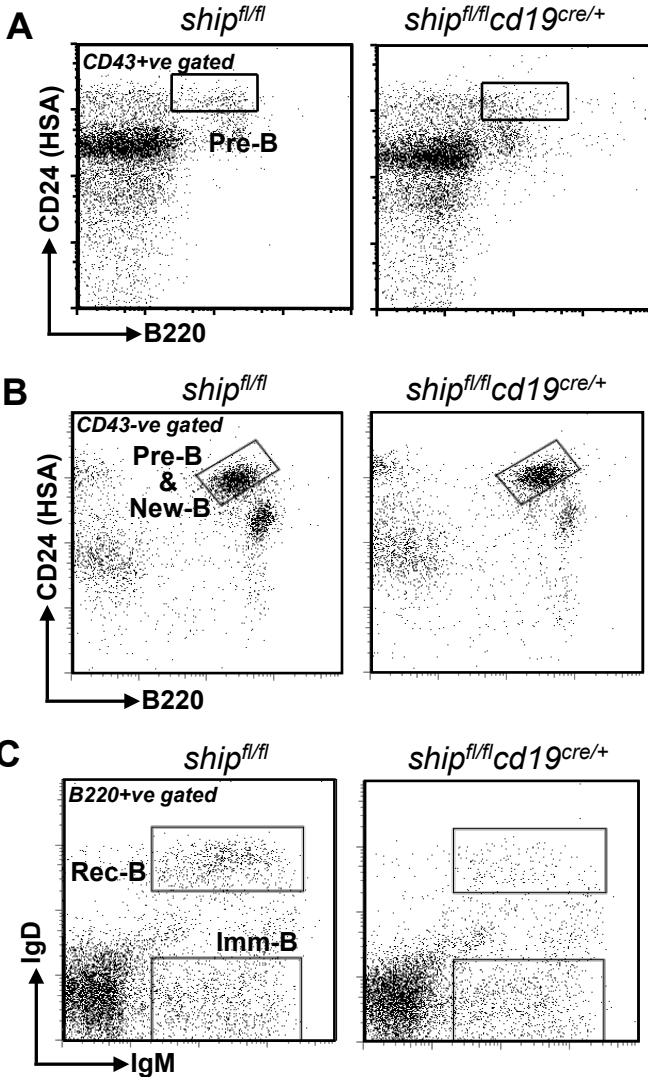

Figure S2

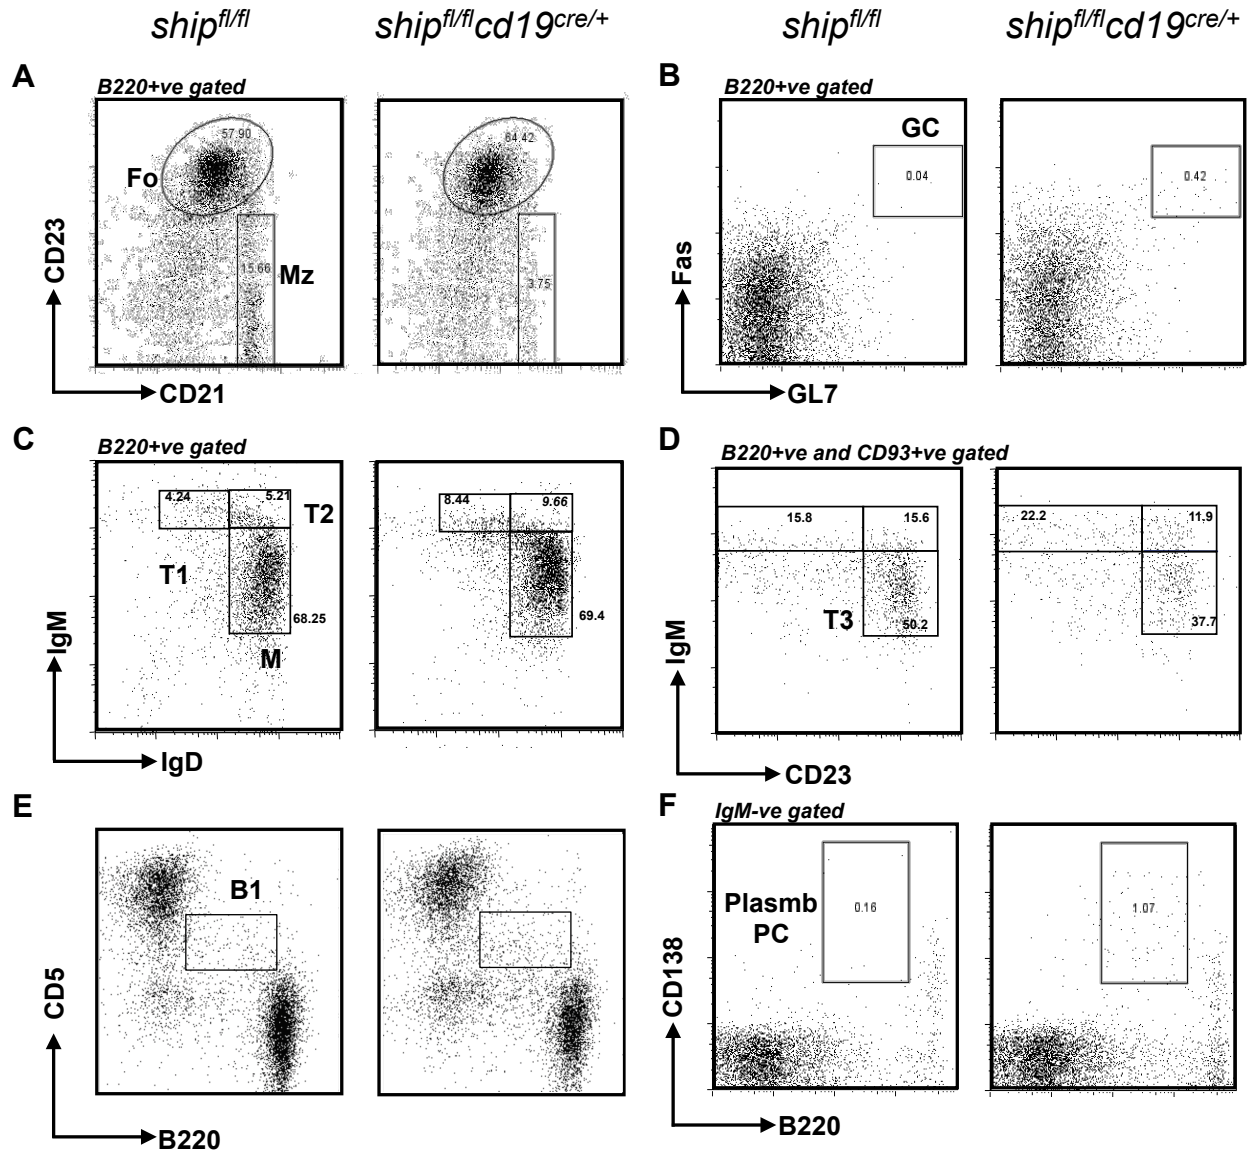

Figure S3

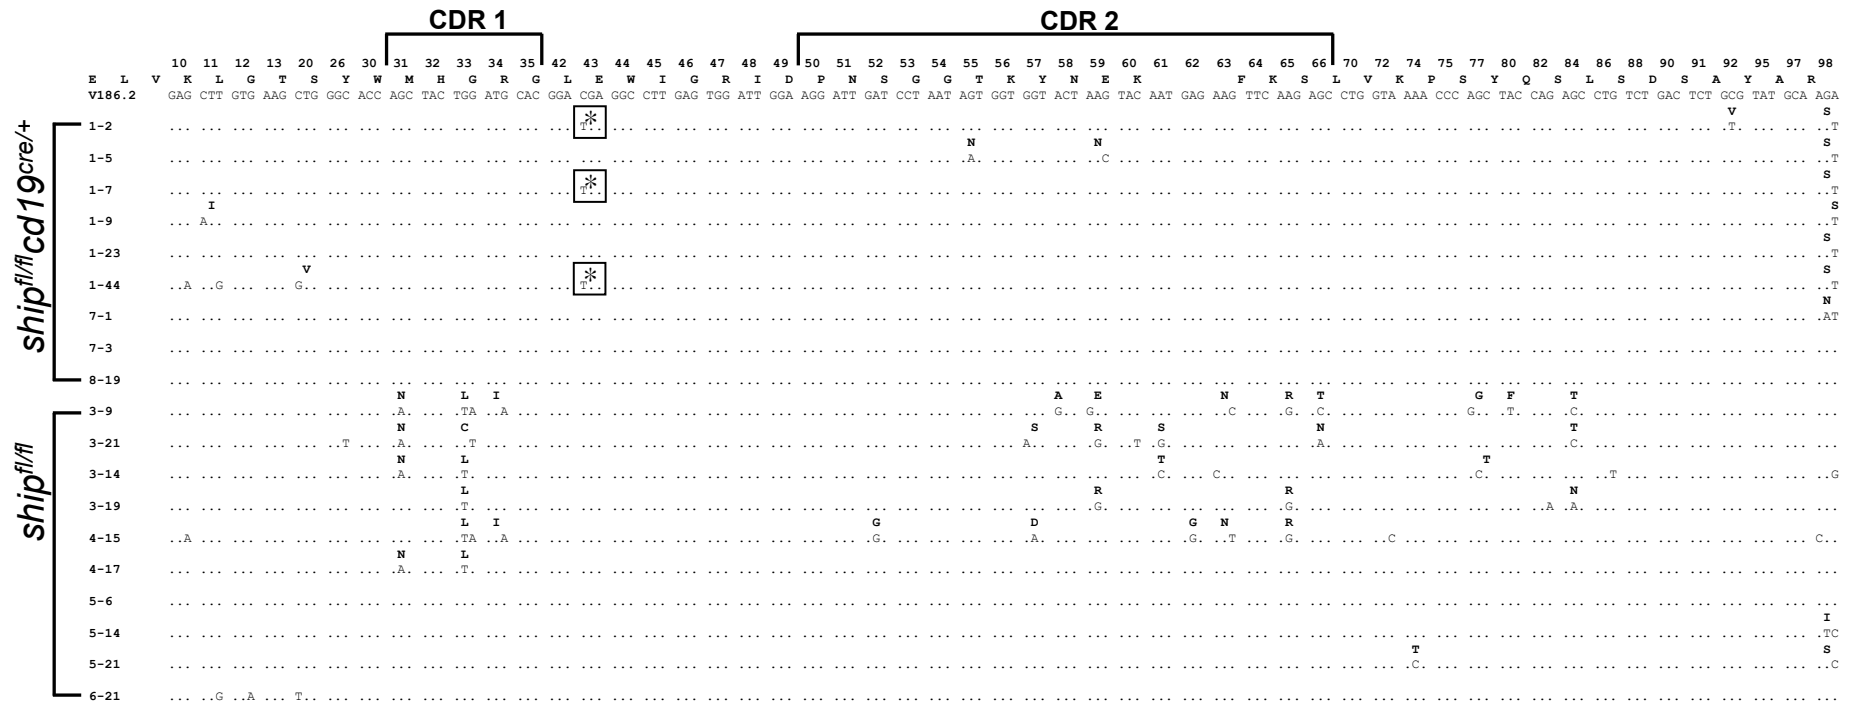

Figure S4

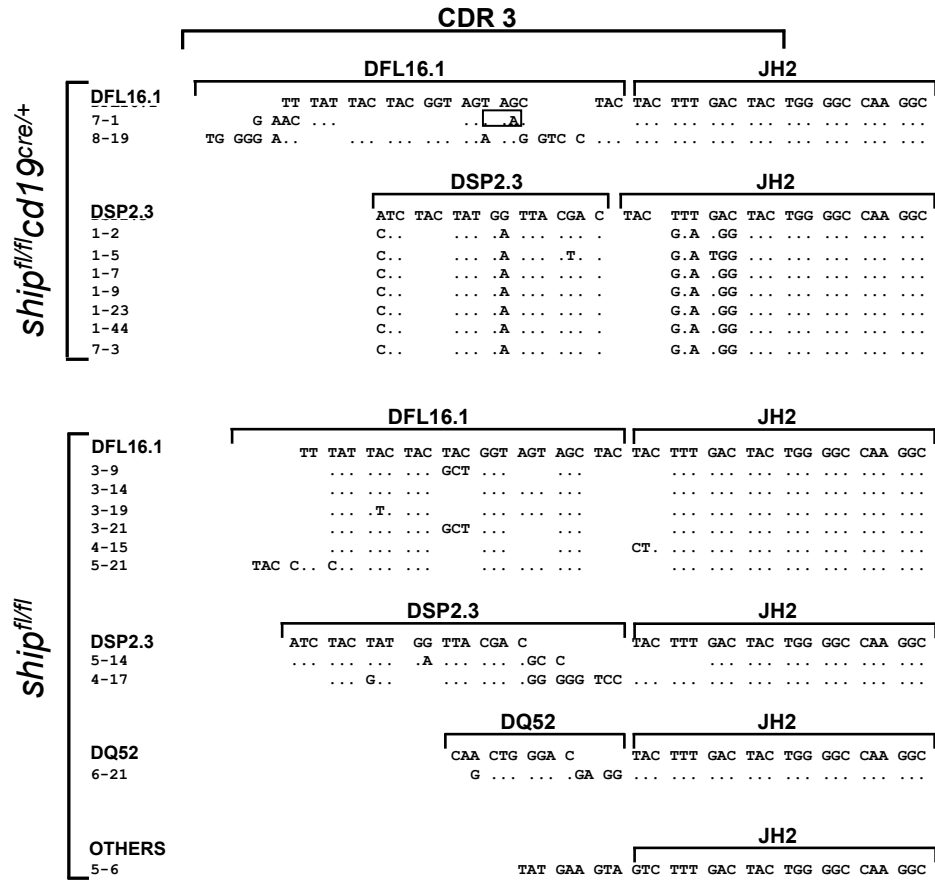

Supplement: NIHMS541534-supplement-supplem__data.pdf [file NIHMS541534-supplement-supplem__data.pdf]
